# Supplementary material for: CARDS, a Novel Prognostic Index for Risk Stratification and In-Hospital Monitoring
Source: MDPI journal article supplement (doi:10.3390/jcm13071961), 2024-03-28
Supplement: s1 [file s1]

Supplemental data

Table of contents:

Supplemental Table S1

Supplemental Table S2

Supplemental Table S3

Table S1. Details of the logistic regression used to develop the risk scoring system.

|                         | Coefficient (b) | Standard error | z-value | P      |
|-------------------------|-----------------|----------------|---------|--------|
| Age                     | 0.006           | 0.005612       | 4.163   | <0.001 |
| CCI                     | 0.129           | 0.009829       | 13.166  | <0.001 |
| Range of fluctuation    | 0.200           | 0.009114       | 21.995  | <0.001 |
| Duration of fluctuation | -0.013          | 0.002268       | -5.677  | <0.001 |

Abbreviation: CCI, Charlson comorbidity index.

Table S2. Demographic and clinical characteristics of patients in derivation and validation cohorts by risk stratification.

| Risk factor                     | Categories | Low risk<br>No. (%) | Intermediate risk<br>No. (%) | High risk<br>No. (%) |
|---------------------------------|------------|---------------------|------------------------------|----------------------|
| Derivation cohort               |            |                     |                              |                      |
| No.                             |            | 21676               | 5575                         | 1028                 |
| Age, yr                         | ≤65        | 17629 (81.3)        | 3731 (66.9)                  | 627 (61.0)           |
|                                 | 66-75      | 3183 (14.7)         | 1130 (20.3)                  | 226 (22.0)           |
|                                 | >75        | 864 (4.0)           | 714 (12.8)                   | 175 (17.0)           |
| CCI                             | ≤2         | 19305 (89.1)        | 2648 (47.5)                  | 58 (5.6)             |
|                                 | >2         | 2371 (10.9)         | 2927 (52.5)                  | 970 (94.4)           |
| Range of fluctuation,<br>mmol/L | ≤6         | 16689 (77.0)        | 1487 (26.7)                  | 0 (0.0)              |
|                                 | 7-10       | 4987 (23.0)         | 1647 (29.5)                  | 37 (3.6)             |
|                                 | >10        | 0 (0.0)             | 2441 (43.8)                  | 991 (96.4)           |
| Duration of<br>fluctuation, d   | >3         | 16514 (76.2)        | 3635 (65.2)                  | 821 (79.9)           |
|                                 | ≤3         | 5162 (23.8)         | 1940 (34.8)                  | 207 (20.1)           |
| Validation cohort               |            |                     |                              |                      |
| No.                             |            | 4079                | 846                          | 119                  |
| Age, yr                         | ≤65        | 3346 (82.0)         | 561 (66.3)                   | 68 (57.1)            |
|                                 | 66-75      | 557 (13.7)          | 156 (18.4)                   | 25 (21.0)            |
|                                 | >75        | 176 (4.3)           | 129 (15.2)                   | 26 (21.8)            |
| CCI                             | ≤2         | 3685 (90.3)         | 387 (45.7)                   | 10 (8.4)             |
|                                 | >2         | 394 (9.7)           | 459 (54.3)                   | 109 (91.6)           |
| Range of fluctuation,<br>mmol/L | ≤6         | 3217 (78.9)         | 295 (34.9)                   | 0 (0.0)              |
|                                 | 7-10       | 862 (21.1)          | 203 (24.0)                   | 7 (5.9)              |
|                                 | >10        | 0 (0.0)             | 348 (41.1)                   | 112 (94.1)           |
| Duration of<br>fluctuation, d   | >3         | 3000 (73.5)         | 518 (61.2)                   | 94 (79.0)            |
|                                 | ≤3         | 1079 (26.5)         | 328 (38.8)                   | 25 (21.0)            |

Abbreviation: CCI, Charlson comorbidity index.

Table S3. Demographic and clinical characteristics of patients in derivation and validation cohorts by range of sodium fluctuation.

|                            |              | Range of serum sodium fluctuation No. (%) |               |               |
|----------------------------|--------------|-------------------------------------------|---------------|---------------|
|                            | Categories   | ≤6                                        | 7-10          | >10           |
| Derivation cohort          |              |                                           |               |               |
| No.                        |              | 18176                                     | 6671          | 3432          |
| Age, mean (SD), yr         |              | 52.48 (15.33)                             | 54.67 (14.97) | 53.98 (16.03) |
| Age, yr                    | ≤65          | 14380 (79.1)                              | 5042 (75.6)   | 2565 (74.7)   |
|                            | 66-75        | 2744 (15.1)                               | 1196 (17.9)   | 599 (17.5)    |
|                            | > 75         | 1052 (5.8)                                | 433 (6.5)     | 268 (7.8)     |
| CCI, mean (SD)             |              | 2.17 (2.88)                               | 2.65 (3.23)   | 2.95 (3.84)   |
| CCI                        | ≤2           | 14318 (78.8)                              | 5194 (77.9)   | 2499 (72.8)   |
|                            | > 2          | 3858 (21.2)                               | 1477 (22.1)   | 933 (27.2)    |
| Duration of fluctuation, d | > 3          | 12396 (68.2)                              | 5545 (83.1)   | 3029 (88.3)   |
|                            | ≤3           | 5780 (31.8)                               | 1126 (16.9)   | 403 (11.7)    |
| Risk of mortality          | Low          | 16689 (91.8)                              | 4987 (74.8)   | 0 (0.0)       |
|                            | Intermediate | 1487 (8.2)                                | 1647 (24.7)   | 2441 (71.1)   |
|                            | High         | 0 (0.0)                                   | 37 (0.6)      | 991 (28.9)    |
| Validation cohort          |              |                                           |               |               |
| No.                        |              | 3512                                      | 1072          | 460           |
| Age, mean (SD), yr         |              | 52.60 (15.12)                             | 53.94 (14.77) | 55.07 (15.27) |
| Age, yr                    | ≤65          | 2802 (79.8)                               | 818 (76.3)    | 355 (77.2)    |
|                            | 66-75        | 490 (14.0)                                | 187 (17.4)    | 61 (13.3)     |
|                            | > 75         | 220 (6.3)                                 | 67 (6.2)      | 44 (9.6)      |
| CCI, mean (SD)             |              | 2.23 (3.05)                               | 2.48 (3.32)   | 2.82 (4.17)   |
| CCI                        | ≤2           | 2823 (80.4)                               | 901 (84.0)    | 358 (77.8)    |
|                            | > 2          | 689 (19.6)                                | 171 (16.0)    | 102 (22.2)    |
| Duration of fluctuation, d | > 3          | 2279 (64.9)                               | 914 (85.3)    | 419 (91.1)    |
|                            | ≤3           | 1233 (35.1)                               | 158 (14.7)    | 41 (8.9)      |
| Risk of mortality          | Low          | 3217 (91.6)                               | 862 (80.4)    | 0 (0.0)       |
|                            | Intermediate | 295 (8.4)                                 | 203 (18.9)    | 348 (75.7)    |
|                            | High         | 0 (0.0)                                   | 7 (0.7)       | 112 (24.3)    |

Abbreviations: CCI, Charlson comorbidity index; SD, standard deviation.
